# Supplementary material for: Systematic development and implementation of interventions to OPtimise Health Literacy and Access (Ophelia)
Source: PubMed Central journal article supplement (PMC5335493; doi:10.1186/s12889-017-4147-5), 2017-03-03
Supplement: 12889_2017_4147_MOESM2_ESM.pdf [file 12889_2017_4147_MOESM2_ESM.pdf]

## Systematic development and implementation of interventions to OPTimise Health Literacy and Access (Ophelia)

### Additional file 2: Implementation and evaluation plan template

|                                                                                                             |                                                                  |                                                                                                                         |                                                                                                                |
|-------------------------------------------------------------------------------------------------------------|------------------------------------------------------------------|-------------------------------------------------------------------------------------------------------------------------|----------------------------------------------------------------------------------------------------------------|
| <b>Intervention aim:</b>                                                                                    |                                                                  |                                                                                                                         |                                                                                                                |
| <b>To prepare the intervention we need to:</b>                                                              | <b>To make the intervention work we need:</b>                    | <b>The intervention is:</b>                                                                                             | <b>What we want to achieve:</b>                                                                                |
| <b>Development Activities</b>                                                                               | <b>Intervention Inputs</b>                                       | <b>Intervention Process (intervention description and timeline)</b>                                                     | <b>Outputs (intervention access and services readiness. Intervention quality and safety)</b>                   |
| <i>(e.g. deliver training session to 3 staff, evaluate and modify, then repeat training to 3 new staff)</i> | <i>(e.g. training materials and content of training session)</i> | <b>Intervention Description</b>                                                                                         | <b>Outcomes - short and medium term (coverage of interventions, prevalence of risk behaviours and factors)</b> |
|                                                                                                             |                                                                  | <i>(e.g. Deliver 60-minute training sessions to all staff in use of teach-back and simplified education strategies)</i> | <i>(e.g. Patients' ability to identify how they will self-manage their condition is improved)</i>              |
| <b>Who will undertake these preparation activities:</b>                                                     |                                                                  |                                                                                                                         | <b>Impact/ longer-term outcomes (improved health outcomes, improved equity, responsiveness, efficiency)</b>    |
| Responsibilities                                                                                            |                                                                  |                                                                                                                         | <i>(e.g. All people in target population are educated according to their needs)</i>                            |
|                                                                                                             |                                                                  |                                                                                                                         |                                                                                                                |
| <b>When tasks will be completed:</b>                                                                        | <b>How we could assess feasibility of intervention:</b>          | <b>How we could assess delivery of intervention:</b>                                                                    | <b>How these achievements could be assessed:</b>                                                               |
| <b>Timeline</b>                                                                                             | <b>Feasibility measures</b>                                      | <b>Process outcome measures</b>                                                                                         |                                                                                                                |
|                                                                                                             | <i>e.g. staffing time &amp; costs</i>                            | <i>e.g. response rate (patient and clinician)</i>                                                                       |                                                                                                                |
